# Supplementary material
Source: MDPI journal article supplement (https://www.mdpi.com/2410-3888/8/2/88)
Supplement: s1 [file s1]

## Supplementary materials

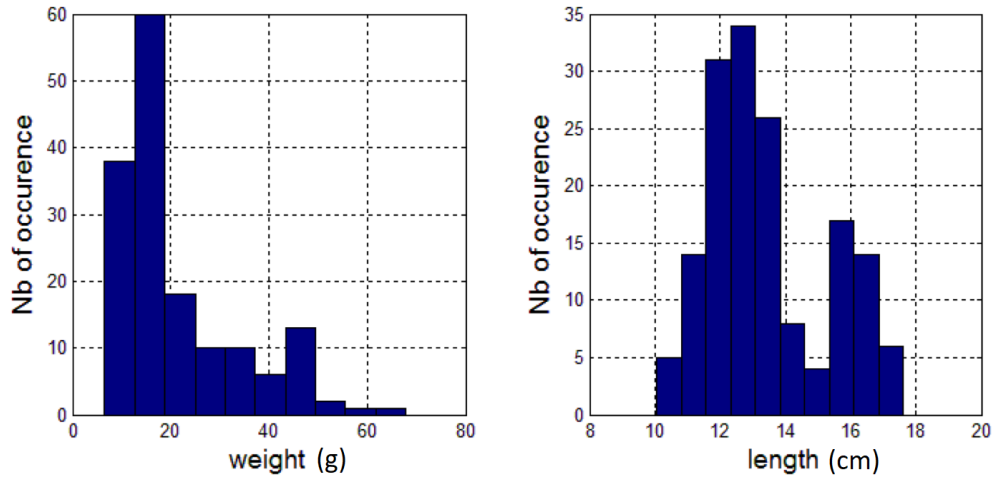

Figure S1: Experimental weight and length distribution

| Weight - PIS1       |       |
|---------------------|-------|
| $Epar_{i1}(f_{j1})$ | r     |
| Xp(20384)           | 0.713 |
| Mo(78880)           | 0.712 |
| Rs(49632)           | 0.702 |
| Ph(10635)           | 0.667 |
| Rp(30133)           | 0.511 |
| Xs(10635)           | 0.291 |

| Weight - PIS2       |       |
|---------------------|-------|
| $Epar_{i1}(f_{j1})$ | r     |
| Xp(20384)           | 0.705 |
| Mo(78880)           | 0.704 |
| Rs(39883)           | 0.689 |
| Ph(10635)           | 0.659 |
| Rp(30133)           | 0.485 |
| Xs(10635)           | 0.291 |

| Length - PIS1       |       |
|---------------------|-------|
| $Epar_{m1}(f_{n1})$ | r     |
| Mo(78880)           | 0.828 |
| Rs(39883)           | 0.805 |
| Xp(10635)           | 0.793 |
| Ph(10635)           | 0.669 |
| Rp(30133)           | 0.646 |
| Xs(10635)           | 0.209 |

| Length - PIS2       |       |
|---------------------|-------|
| $Epar_{m1}(f_{n1})$ | r     |
| Mo(78880)           | 0.818 |
| Rs(39883)           | 0.791 |
| Xp(20384)           | 0.784 |
| Ph(10635)           | 0.661 |
| Rp(30133)           | 0.618 |
| Xs(885)             | 0.287 |

Table S1: Top 6 Pearson's r with a single variable regression

| Weight - ME-SF      |                     |       | Length - ME-SF      |                     |       |
|---------------------|---------------------|-------|---------------------|---------------------|-------|
| $Epar_{i1}(f_{j1})$ | $Epar_{i2}(f_{j2})$ | r     | $Epar_{m1}(f_{n1})$ | $Epar_{m2}(f_{n2})$ | r     |
| Xs(20.384)          | Ph(20.384)          | 0.758 | Xs(69.131)          | Ph(69.131)          | 0.851 |
| Rp(49.632)          | Ph(49.632)          | 0.753 | Rp(39.883)          | Ph(39.883)          | 0.845 |
| Mo(10.635)          | Ph(10.635)          | 0.741 | Mo(78.880)          | Ph(78.880)          | 0.844 |
| Rs(10.635)          | Ph(10.635)          | 0.739 | Rs(98.379)          | Mo(98.379)          | 0.842 |
| Rs(98.379)          | Mo(98.379)          | 0.732 | Rp(98.379)          | Mo(98.379)          | 0.840 |
| Xs(88.629)          | Mo(88.629)          | 0.731 | Xs(78.880)          | Mo(78.880)          | 0.839 |

  

| Weight - SE-MF      |                     |       | Length - SE-MF      |                     |       |
|---------------------|---------------------|-------|---------------------|---------------------|-------|
| $Epar_{i1}(f_{j1})$ | $Epar_{i2}(f_{j2})$ | r     | $Epar_{m1}(f_{n1})$ | $Epar_{m2}(f_{n2})$ | r     |
| Mo(20.384)          | Mo(30.133)          | 0.812 | Mo(20.384)          | Mo(30.133)          | 0.887 |
| Rs(10.635)          | Rs(20.384)          | 0.783 | Rs(10.635)          | Rs(20.384)          | 0.854 |
| Ph(49.632)          | Ph(59.381)          | 0.752 | Xp(20.384)          | Xp(39.883)          | 0.823 |
| Xp(30.133)          | Xp(39.883)          | 0.744 | Rp(10.635)          | Rp(20.384)          | 0.820 |
| Rp(10.635)          | Rp(20.384)          | 0.737 | Ph(49.632)          | Ph(59.381)          | 0.740 |
| Xs(0.885)           | Xs(10.635)          | 0.598 | Xs(0.885)           | Xs(10.635)          | 0.584 |

  

| Weight - ME-MF      |                     |       | Length - ME-MF      |                     |       |
|---------------------|---------------------|-------|---------------------|---------------------|-------|
| $Epar_{i1}(f_{j1})$ | $Epar_{i2}(f_{j2})$ | r     | $Epar_{m1}(f_{n1})$ | $Epar_{m2}(f_{n2})$ | r     |
| Ph(30.133)          | Xs(78.880)          | 0.844 | Ph(30.133)          | Xs(59.381)          | 0.907 |
| Rp(10.635)          | Mo(49.632)          | 0.813 | Rp(10.635)          | Mo(49.632)          | 0.885 |
| Ph(20.384)          | Rp(49.632)          | 0.809 | Ph(20.384)          | Rp(49.632)          | 0.880 |
| Ph(10.635)          | Mo(98.379)          | 0.799 | Ph(20.384)          | Mo(98.379)          | 0.878 |
| Xs(10.635)          | Mo(78.880)          | 0.797 | Xs(10.635)          | Mo(78.880)          | 0.875 |
| Xs(20.384)          | Rp(39.883)          | 0.784 | Rs(10.635)          | Mo(39.883)          | 0.869 |

Table S2: Top 6 Pearson's r with a two variable regression

| Weight with 3 variables |       |                     |                     |                     |
|-------------------------|-------|---------------------|---------------------|---------------------|
|                         | r     | $Epar_{i1}(f_{j1})$ | $Epar_{i2}(f_{j2})$ | $Epar_{i3}(f_{j3})$ |
| ME-MF                   | 0.854 | Xp(10.635)          | Ph(20.384)          | Rp(39.883)          |
| SE-MF                   | 0.827 | Rs(20.384)          | Rs(39.883)          | Rs(59.381)          |
| ME-SF                   | 0.793 | Rs(30.133)          | Mo(30.133)          | Ph(30.133)          |

  

| Length with 3 variables |       |                     |                     |                     |
|-------------------------|-------|---------------------|---------------------|---------------------|
|                         | r     | $Epar_{m1}(f_{n1})$ | $Epar_{m2}(f_{n2})$ | $Epar_{m3}(f_{n3})$ |
| ME-MF                   | 0.907 | Ph(20.384)          | Xp(30.133)          | Mo(78.880)          |
| SE-MF                   | 0.889 | Mo(20.384)          | Mo(39.883)          | Mo(69.131)          |
| ME-SF                   | 0.864 | Rs(30.133)          | Mo(30.133)          | Ph(30.133)          |

Table S3: Top 6 Pearson's r with a three variable regression

| Weight with 4 variables |       |                     |                     |                     |                     |
|-------------------------|-------|---------------------|---------------------|---------------------|---------------------|
|                         | r     | $Epar_{i1}(f_{j1})$ | $Epar_{i2}(f_{j2})$ | $Epar_{i3}(f_{j3})$ | $Epar_{i4}(f_{j4})$ |
| ME-MF                   | 0.867 | Xp(10.635)          | Ph(20.384)          | Mo(39.883)          | Rs(78.880)          |
| SE-MF                   | 0.831 | Rs(20.384)          | Rs(39.883)          | Rs(78.880)          | Rs(98.379)          |
| ME-SF                   | 0.813 | Rs(49.632)          | Rp(49.632)          | Mo(49.632)          | Ph(49.632)          |

  

| Length with 4 variables |       |                     |                     |                     |                     |
|-------------------------|-------|---------------------|---------------------|---------------------|---------------------|
|                         | r     | $Epar_{m1}(f_{n1})$ | $Epar_{m2}(f_{n2})$ | $Epar_{m3}(f_{n3})$ | $Epar_{m4}(f_{n4})$ |
| ME-MF                   | 0.917 | Xs(0.885)           | Xp(10.635)          | Ph(20.384)          | Mo(59.381)          |
| SE-MF                   | 0.892 | Mo(10.635)          | Mo(20.384)          | Mo(39.883)          | Mo(69.131)          |
| ME-SF                   | 0.876 | Rs(49.632)          | Rp(49.632)          | Mo(49.632)          | Ph(49.632)          |

  

| Weight with 5 variables |       |                     |                     |                     |                     |                     |
|-------------------------|-------|---------------------|---------------------|---------------------|---------------------|---------------------|
|                         | r     | $Epar_{i1}(f_{j1})$ | $Epar_{i2}(f_{j2})$ | $Epar_{i3}(f_{j3})$ | $Epar_{i4}(f_{j4})$ | $Epar_{i5}(f_{j5})$ |
| ME-MF                   | 0.872 | Xp(10.635)          | Ph(30.133)          | Mo(59.381)          | Rs(78.880)          | Rp(98.379)          |
| SE-MF                   | 0.833 | Rs(20.384)          | Rs(30.133)          | Rs(49.632)          | Rs(78.880)          | Rs(98.379)          |
| ME-SF                   | 0.816 | Rs(49.632)          | Rp(49.632)          | Xp(49.632)          | Mo(49.632)          | Ph(49.632)          |

  

| Length with 5 variables |       |                     |                     |                     |                     |                     |
|-------------------------|-------|---------------------|---------------------|---------------------|---------------------|---------------------|
|                         | r     | $Epar_{m1}(f_{n1})$ | $Epar_{m2}(f_{n2})$ | $Epar_{m3}(f_{n3})$ | $Epar_{m4}(f_{n4})$ | $Epar_{m5}(f_{n5})$ |
| ME-MF                   | 0.922 | Xs(0.885)           | Xp(10.635)          | Ph(20.384)          | Rs(30.133)          | Mo(39.883)          |
| SE-MF                   | 0.895 | Mo(0.885)           | Mo(10.635)          | Mo(20.384)          | Mo(39.883)          | Mo(69.131)          |
| ME-SF                   | 0.879 | Rs(49.632)          | Rp(49.632)          | Xp(49.632)          | Mo(49.632)          | Ph(49.632)          |

Table S4: Best correlation equations with 4 and 5 variables
